# Supplementary material for: Homogenization of the Observatoire de Haute Provence ECC ozonesonde data record: comparison with lidar and satellite observations
Source: Copernicus journal article supplement (doi:10.5194/amt-2022-7), 2022-01-12
Supplement: Supplementary file [file amt-2022-7-AC2-supplement.pdf]

# Homogenization of the Observatoire de Haute Provence ECC ozonesonde data record: comparison with lidar and satellite observations

G rard Ancellet<sup>1</sup>, Sophie Godin-Beekmann<sup>1</sup>, Herman G.J. Smit<sup>2</sup>, Ryan M. Stauffer<sup>3</sup>, Roeland Van Malderen<sup>4</sup>, Renaud Bodichon<sup>5</sup>, and Andrea Pazmi o<sup>1</sup>

<sup>1</sup>LATMOS, Sorbonne Universit , Universit  Versailles St-Quentin, CNRS/INSU, Paris, France

<sup>2</sup>Forschungszentrum J lich IEK-8, J lich, Germany

<sup>3</sup>NASA Goddard Space Flight Center, Atmospheric Chemistry and Dynamics Lab, Greenbelt, Md, USA

<sup>4</sup>Royal Meteorological Institute, Uccle, Belgium

<sup>5</sup>IPSL, Sorbonne Universit , Universit  Versailles St-Quentin, CNRS/INSU, Paris, France

**Correspondence:** gerard.ancellet@latmos.ipsl.fr

**Abstract.** The Observatoire de Haute Provence (OHP) weekly Electrochemical Concentration Cell (ECC) ozonesonde data have been homogenized for the time period 1991-2021 according to the recommendations of the Ozonesonde Data Quality Assessment (O3S-DQA) panel. The assessment of the ECC homogenization benefit has been carried out using comparisons with **other ozone measuring** ground based instruments ~~also measuring ozone~~ at the same station (lidar, surface measurements) and with collocated satellite observations of the O<sub>3</sub> vertical profile by Microwave Limb Sounder (MLS). The major differences between uncorrected and homogenized ECC data are related to a change of ozonesonde type in 1997, removal of the pressure dependency of the ECC background current and correction of internal pump temperature. The **original** 3-4 ppbv positive bias between ECC and lidar in the troposphere is corrected with the homogenization. The ECC 30-years trends of the seasonally adjusted ozone concentrations are also significantly improved in both the troposphere and the stratosphere after the ECC homogenization, as shown by the ECC/lidar or ECC/surface ozone trend comparisons. A ~~-0.29%~~**-0.19%** per year negative trend of the normalization factor ( $N_T$ ) calculated using independent measurements of the total ozone column (TOC) at OHP disappears after homogenization of the ECC data. There is however a remaining ~~-5%~~**-3.7%** negative bias in the TOC which is likely related to an underestimate of the ECC concentrations in the stratosphere above 50 hPa as shown by direct comparison with the OHP lidar and MLS. The reason for this bias is still unclear, but a possible explanation might be ~~related to~~ freezing or evaporation of the sonde solution in the stratosphere. Both the comparisons with lidar and satellite observations suggest that homogenization increases the negative bias of the ECC ~~up to 10%~~**to values lower than -6%** above 28 km.

## 1 Introduction

Stratospheric ozone recovery is expected due to a ~~decrease~~**decreasing atmospheric amounts** of ozone depleting substances. Trends of ozone in the upper troposphere, lower and mid stratosphere however show latitudinal and seasonal variabilities which depend on (i) dynamical variability of the atmosphere, (ii) the temperature dependence of stratospheric ozone photochemistry,

(iii) the increase of tropospheric ozone precursors in the upper troposphere (Szelag et al., 2020; Cohen et al., 2018; Thompson et al., 2021). A large number of validation and intercomparison studies of free tropospheric and lower stratospheric ozone use balloon borne Electrochemical Concentration Cells (ECC) as reference (Tarasick et al., 2021). At Observatoire de Haute Provence (OHP), stratospheric and free tropospheric ozone monitoring is carried out since the mid-1980s with ozonesonde and  
25 lidar observations. The OHP station, located at 44°N,6°E, is one of the few long-term measuring stations for vertical ozone profiles in Southern Europe. This station allows the characterization of (i) the impact of ozone sources observed in one of the hot spots of **high** the tropospheric ozone column amounts observed by satellite (Richards et al., 2013) and (ii) the **effects of** climate variability on mid-latitudes total column ozone (Zhang et al., 2015; Petkov et al., 2014). Improvement and homogenization of the OHP ozone ECC observations have been achieved from 1991 to 2021 using the recent ozonesonde data quality assessment  
30 (O3S-DQA) panel recommendations (Smit et al., 2012; Smit and Thompson, 2021). An extensive use of lidar measurements both at tropospheric and stratospheric altitudes together with co-located satellite observations obtained during the OHP ECC soundings has allowed the quantification of the ozone measurement improvement achieved with this homogenization of the ECC ozonesondes. Sections 2 and 3 summarize the corrections made to the ozonesonde measurements and the methodology for assessing its benefit. Section 4 presents and discusses the results of the different instrumental comparisons and the changes  
35 obtained in terms of interannual ozone variation at different altitudes between 0.7 and 30 km ASL.

## 2 Description of the ozonesonde homogenization

A total number of 1412 ECC ozonesondes have been launched at OHP since 1991 when Brewer-Mast regular soundings have been replaced by ECC sondes following the preparation instructions of Komhyr (1986) just after a lidar/ozonesonde intercomparison campaign held at OHP in 1989 (Beekmann et al., 1994). Ozonesondes are launched once a week generally  
40 near 9 UT but 40 soundings have been made during the night either for lidar/ozonesonde comparison or for detection of long range transport of polar ozone streamers forecasted by chemical transport models. The ozone partial pressure  $P_{O_3}$  measured in mPa by the ECC can be obtained from the electrochemical current  $I$  measured in  $\mu A$ , the background current  $I_b$  measured in the preparation laboratory with an ozone removal filter after the sonde was exposed to ozone, the internal temperature of the air sample  $T_i$  in K, the capture efficiency of the  $O_3$  in the liquid phase  $\alpha$ , the stoichiometry  $S$  of the  $O_3$  to  $I_2$  conversion and the  
45 ECC pump flow rate,  $\phi_p$  in  $cm^3s^{-1}$  (Smit and Thompson, 2021).

$$P_{O_3} = 4.307 \cdot 10^{-2} \cdot (I - I_b) \cdot T_i / (S \cdot \alpha \cdot \phi_p) \quad (1)$$

A major change in the sounding procedure occurred in 1997 when the Science Pump Corporation (SPC) ozonesonde was replaced by an EnSci ozonesonde while using a Sensing Solution Type (SST) of 1% (1% KI concentration and a full buffer concentration; (Smit and Thompson, 2021)). Using the instructions given by the O3S-DQA, the following corrections have  
50 been implemented ~~before a new calculation of  $P_{O_3}$  after homogenization using~~ **in** equation 1:

- Change of  $\alpha$  and its pressure dependency before 1996 when 2.5  $cm^3$  of KI solution was used in the cell **instead of the recommended 3  $cm^3$** .

- Scaling of  $P_{O_3}$  measured by the EnSci-SST 1% ozonesondes after March 1997 to  $P_{O_3}$  from SPC-SST 1% ozonesonde observations made before March 1997 assuming that SPC-SST 1% is a better reference than EnSci-SST 1% (Deshler et al., 2017). This correction is larger than -10% at altitudes above 30 km and on the order of -4% in the troposphere.
- When  $I_b > 0.1 \mu A$  (less than 6% of the data set),  $I_b$  is replaced by  $0.05 \mu A$ , the average of the measured background current for our dataset, while the uncertainty of  $I_b$  becomes  $0.1 \mu A$ .
- The pressure dependency of the background current has been removed for the homogenized version since the  $O_2$  concentration does not play a significant role in the residual current when ozone is removed (Thornton and Niaz, 1983; Vömel and Diaz, 2010).
- No vertical smoothing of the ozone partial pressure. **Smoothing over 100 m was applied in the uncorrected data, i.e. before homogenization.**
- Correction of measured  $T_i$  to account for changes in the position of the thermistor and for differences with the true air sample temperature (the thermistor was taped to the pump before July 2007 and inserted in the pump hole since that time)
- Correction of the pump flow rate to account for the humidification effect when using the bubble flowmeter to determine the flowrate in the laboratory as part of the pre-flight preparation of the sonde.
- Two different **correction tables of the pump flow rate efficiency** ~~correction tables~~ at pressures below 100 hPa are now applied for EnSci (Komhyr95) and SPC (Komhyr86) ozonesonde. ~~Only Komhyr86 was applied for the current to  $P_{O_3}$  conversion of~~ **all the** uncorrected data.

As the background current uncertainty is a significant contribution to the  $P_{O_3}$  uncertainty in the upper troposphere (Van Malderen et al., 2016), the comparison of  $I_b$  used before and after homogenization is shown in Fig.1. ~~We see that there is no significant trend~~ **The standard deviation** of the background current between 1991 and 2021 **remains on the order of  $\pm 0.05$**  and only 17% of the  $I_b$  values are ~~above 0.05~~ **greater than the mean of the uncorrected  $I_b$**  after homogenization. The removal of the pressure dependency of the background current leads to significant relative differences (>5%) in the upper troposphere where the ECC current is smallest. In February 2004, the UHF receiver and ground calibration tools were changed and a new processing software STRATO developed by H. Vömel at NOAA (<http://cires1.colorado.edu/voemel/strato/strato.html>) was implemented for the  $O_3$  partial pressure retrieval. The raw ECC current data files no longer exist between February 2004 and July 2007 and the ECC currents have been retrieved from the uncorrected ozone partial pressure using equation 1. The recorded lab temperature and relative humidity are used for the pump flow rate correction of ozonesondes launched after June 1999 (except in 2002 and 2003), for the other dates the monthly means of the lab temperature and relative humidity terms in the pump flow rate equation (Smit et al., 2012) are used.

In July 2007, the radiosonde type switched from Vaisala RS80 to MODEM M10. The MODEM M10 measures the true GPS altitude with the pressure altitude retrieved from this measurement. No correction is applied to the RS80 pressure measurements

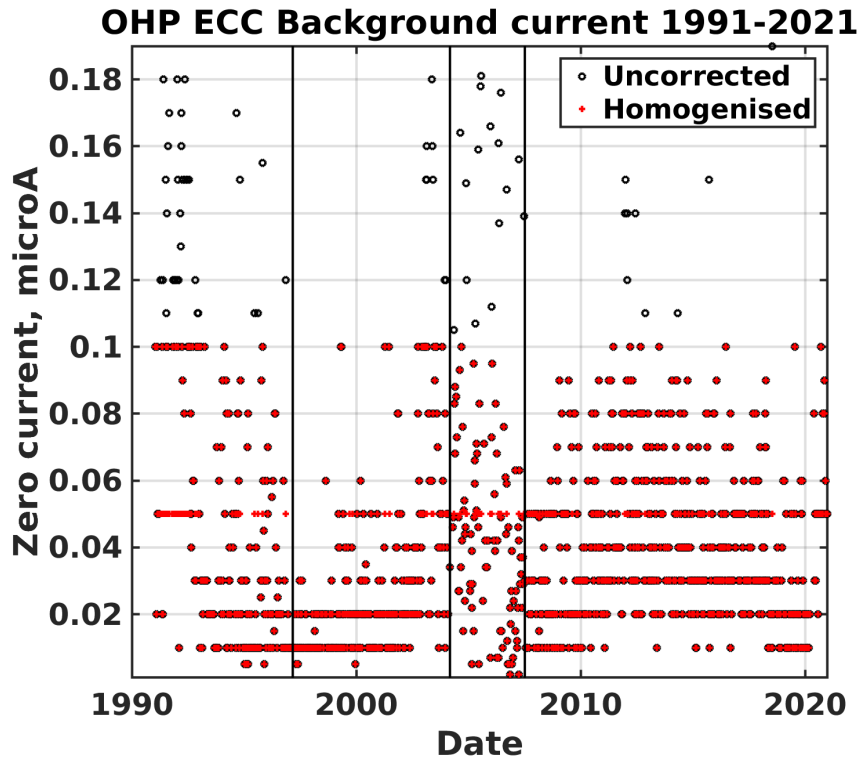

**Figure 1.** Time evolution of the OHP ECC background current from 1991 to 2021. The red crosses are the currents after homogenization and the black circle before. The black lines correspond to the major ozonesonde changes in 1997, 2004 and 2007 (see Fig. 2).

85 and an offset of 0.5-1 hPa may exist in the stratospheric pressures above 20 km before 2007 (Tarasick et al., 2021; Stauffer et al., 2014).

The homogenized minus uncorrected ECC partial pressures normalized to the homogenized ECC ozone partial pressure are shown in Fig.2. Significant overall negative differences ( $\leq -5\%$ ) are obtained (i) in the upper troposphere (8-12 km) because of the removal of  $I_b$  pressure dependency and (ii) above 28 km after 1997 when taking into account the change to EnSci. Positive differences reaching 5% in the stratosphere are also observed for the SPC period before 1997 because of the positive corrections for the pump flow rate (+2%) and the ECC pump temperature (+3%) without any negative corrections in the stratosphere.

95 The UV/visible SAOZ (Système d'Analyse par Observation Zénithale) and the UV Dobson spectrophotometer total ozone column (TOC) measurements are available at OHP. Dobson was used from 1991 to 2004 and SAOZ from 2004 up to now. The so-called normalization factor ( $N_T$ ) is calculated as the ratio of the spectrophotometer TOC and the ECC TOC. Following the methodology used in Smit and Thompson (2021) or Stauffer et al. (2020), the TOC corresponding to the ECC soundings is calculated using the integration of the ozone concentrations up to 10 hPa or the burst altitude, provided it is higher than 25 km. The residual ozone above 10 hPa or the burst altitude has been calculated using the monthly mean climatology of McPeters and Labow (2012) at pressures smaller than 10 hPa. The homogenized data are not normalized with this normalization factor

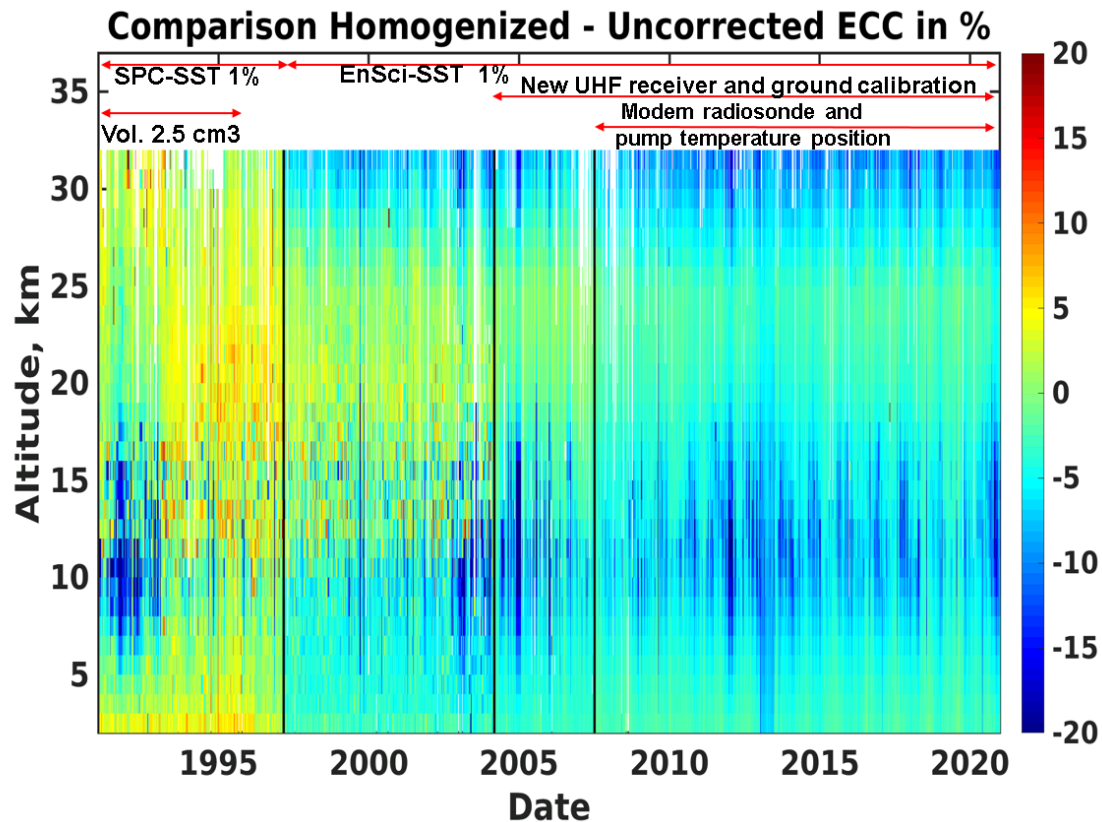

**Figure 2.** Time evolution of the relative difference between homogenized and uncorrected ozone concentrations as a function of altitude. Color scale is in %. Major changes in the sounding procedure or processing are shown in the top part of the figure. Pump flow rate corrections and removal of  $I_b$  pressure dependency are applied to the entire data set.

100 **which is only used as a quality flag**, based on the OHP stratospheric lidar up to 40 km and satellite observations above (Robbins et al. 89). The residual ozone is also multiplied by the ratio between the climatological  $O_3$  concentration at burst level and the measured ECC  $O_3$  concentrations in the 100-m layer below the burst level so that only the relative dependence of the monthly climatology with altitude is taken into account in this calculation.

105 The homogenization procedure also includes a retrieval of the uncertainty on the ozone partial pressure at each vertical level. **The detailed description of the uncertainty calculation is given in Smit and Thompson (2021). All the error terms have been included in our calculation except the bias due the sensor time response and the pressure uncertainty.** The median value of the relative **error/uncertainty** on the ozone concentration measured by the ECC is on the order of 6-7% in the stratosphere and 7-9% in the troposphere (see section 4.2 showing the vertical distribution of the relative **error/uncertainty** of the ECC ozone concentrations used for the lidar-ECC comparisons).

### 3 Data and homogenization assessment

110 In this work, the benefit from homogenization of the ECC ozonesonde timeseries is assessed by comparison of homogenized and non homogenized ECC ozone concentrations with other ozone measurements carried out at OHP. First, these comparisons are made as a function of altitude using either Ultraviolet Differential Absorption Lidar (UV-DIAL) or Microwave Limb Sounder (MLS) satellite observations in the stratosphere (Froidevaux et al., 2008). Two UV-DIAL have been operated at OHP. The first one, LiO3St, is optimized for stratospheric O<sub>3</sub> profiling between 10 and 50 km ASL using an absorbed wavelength at 308 nm and a reference wavelength at 355 nm (Godin-Beekmann et al., 2002). The second one, LiO3Tr, is optimized for tropospheric ozone monitoring between 2.5 and 14 km ASL using the 289 nm and 316 nm wavelength pair (Ancellet and Beekmann, 1997). Regular nighttime measurements (2-4 per week) have been made with LiO3St since 1985 and with LiO3Tr since 1990. The LiO3Tr is most accurate in the 6 km to 10 km altitude range with the smallest lidar systematic ~~error~~ **uncertainty** (< 8%) due to **the mismatch of the** overlap function ~~mismatch~~ between the two wavelengths at ranges below 4 km and due to the background signal correction of the photomultipliers (PMT) nonlinear response above 10 km (Ancellet and Ravetta, 2003). The LiO3St best accuracy ( $\leq 5\%$ ) is generally in the 15-40 km altitude range when ozone concentrations are large enough to minimize lidar systematic errors and when signal-to-noise (SNR) ratio is maximum (Nair et al., 2011). The **uncertainty of the** retrieved ozone concentration ~~error~~ at each vertical level for LiO3Tr takes into account the statistical ~~error~~ **uncertainty** due to the detection noise and the **accuracy of the** systematic error **corrections. The following systematic errors have been taken** **into account: (i) the estimation of the time dependent** background signal ~~correction~~ and (ii) the residual error ~~below 4 km~~ when correcting the effect of a differential overlap function **at altitudes lower than 4 km**. The retrieved ozone concentration ~~error~~ **accuracy** for LiO3St is calculated using the recommendations of Leblanc et al. (2016), not including a possible systematic error ~~of~~ **lower than 2%** due to the O<sub>3</sub> absorption cross section accuracy. To minimize the impact of spatio-temporal variability of ozone concentrations on the analysis of lidar-ozonesonde comparisons (Liu et al., 2013), ~~only~~ nighttime soundings with a time lag of less than 2 hours or 6 hours were considered in the troposphere or the stratosphere, respectively. We end up with a set of about 40 profiles for each lidar between 1994 and 2021. The time distribution of the number of lidar profiles per year for optimal comparison with ECC is shown for LiO3Tr and LiO3St in Fig.3.

The 2005-2021 stratospheric O<sub>3</sub> profiles from AURA MLS v5 level 2 files have been also retrieved from 56.23 hPa to 6.81 hPa with a vertical resolution on the order of 2 km at these levels. The overpass criteria is  $\pm 5$ deg latitude,  $\pm 8$ deg longitude, and all MLS profiles meeting this distance criteria within one day of the sonde are averaged to make the comparison with the ozonesonde. Although the spatio-temporal differences between ECC soundings and satellite overpasses will be greater using these criteria, we obtain many more comparisons than by restricting ourselves to nighttime soundings. ~~The ECC/satellite comparison will then be complementary of the ECC/lidar difference analysis.~~ **For the sake of a more complete discussion of the two types of comparisons made in the stratosphere, we also considered a lidar data set of 366 profiles from 2005 to 2021 with less restrictive measurement time difference with the ECC launches (< 12h). Such a criterion is valid as long as the rapid O<sub>3</sub> variations typically encountered below 18 km are not present.**

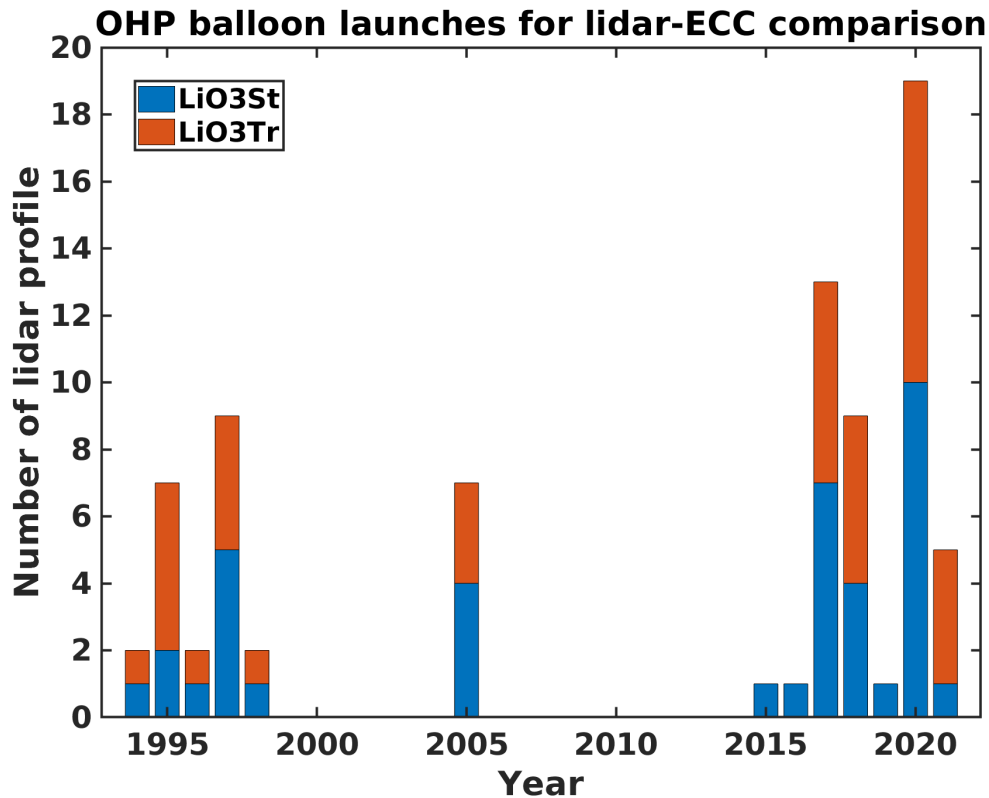

**Figure 3.** Time distribution of the number of OHP lidar observations per year with a time lag between ECC launches and lidar measurement < 2 hours (LiO3Tr) or < 6 hours (LiO3St). These observations are used for the lidar-ECC comparison of Fig.5 and 6. The blue bars correspond to LiO3St measurements and red bars to LiO3Tr.

Secondly, comparisons of total ozone column (TOC) are also useful to check the added value benefit of the homogenization in the stratosphere. In addition to the TOC provided by the OHP spectrophotometer (Hendrick et al., 2011; Van Roozendael et al., 1998), satellite TOC level 2 overpass measurements by AURA Ozone Monitoring Instrument (OMI), Suomi-NPP Ozone Mapping and Profiler Suite (OMPS) and Global Ozone Monitoring Experiment (GOME) 2A and B have been selected when they are within 12 hours of the ozonesonde and selecting the closest pixel in time and space to the ozonesonde station. The vast majority of L2 TOC are within 100 km of OHP. The corresponding ECC sounding TOC used for the satellite comparison, is calculated using the integration of the ozone concentrations up to 10 hPa and the McPeters and Labow (2012) climatology above 10 hPa.

Thirdly, the benefit of homogenization on long term ozone trends for several altitude ranges in the troposphere and the stratosphere has been studied using all the lidar and ECC measurements made at OHP. The lidar monitoring period is indeed as long as the ozonesonde data set, and includes the major ozonesonde preparation or ozonesonde type changes in 1997, 2004 and 2007. Only simple linear trends of the ozone concentrations corrected for the mean seasonal variation at OHP will

be considered in this study for the assessment of the homogenization. The trend uncertainties are calculated using the 95% confidence limit of the slope of the linear regression assuming that the residuals are not correlated for weekly (ECC) or 2/3 per week (lidar) observations. A more comprehensive trend analysis for the OHP would need either multiple linear regression model as described in Nair et al. (2013) or Thompson et al. (2021) for the stratosphere or statistical regularization method as described in Chang et al. (2020) for the troposphere when data sampling is sparse. For the stratospheric trend the period 1990-1995 is removed to minimize interferences by the eruption of Mt Pinatubo. Lidar and satellite ozone observations cannot be retrieved in the lowest atmospheric layer below 2 km ASL, O<sub>3</sub> surface observations are then included using measurements of a TEI-49C instrument with an air intake on the roof of the lidar building. Data are recorded continuously since December 1997, except between June 2010 and August 2012 when the responsibility for surface ozone measurements was entrusted to ATMOS-SUD air quality network at the same location. Data between July 2002 and July 2003 have been also removed because of a contamination problem in the air intake. The trend of O<sub>3</sub> surface observations is compared to ECC trends using either all the daily mean O<sub>3</sub> surface data available since 1998 and corrected for the mean seasonal variation or the hourly mean O<sub>3</sub> concentration measured on the day and time of the ECC launch and also corrected for. The correction of the corresponding mean seasonal variation is applied to both data sets. A significant difference between the two surface concentration trends might point towards a strong sensitivity of the trend sign to the limited number of observations by the ECC.

## 4 Results and discussion

### 4.1 Normalization Factor Trend

The time evolution of the normalization factor  $N_T$  is plotted in Fig. 4 for the uncorrected and homogenized OHP ECC sondes. The major changes in the ozonesonde supplier or the ozonesonde preparation procedure shown in Fig. 2 are also reported in Fig. 4. The uncorrected  $N_T$  time evolution shows that the dispersion of points is larger before the switch to MODEM ozonesonde in 2007, but more striking is the significant negative trend of  $-0.29 \pm 0.04\%$   ~~$-0.19 \pm 0.03\%$~~  per year which is as large as ~~not negligible compared to the~~ reported O<sub>3</sub> trends in the troposphere (Gaudel et al., 2018). The homogenized  $N_T$  does not exhibit a significant trend ( $0.00 \pm 0.04\%/year$ ) ~~( $0.02 \pm 0.03\%/year$ )~~, indicating the strong benefit of the homogenization. However the average normalization factor for the whole data record is not equal to 1 but shows a likely ~~5% increase from 1.019 to 1.037, corresponding to a -3.7% bias of the ECC TOC compared to the OHP spectrophotometer.~~ This may be partly due to the calculation of residual ozone above the burst altitude and partly to a possible bias in the stratosphere. The calculation of the residual ozone which ~~represents~~ ~~accounts for 7-10% of the ECC TOC leads to an uncertainty of about 1% of the TOC according to Witte et al. (2018).~~ depends strongly on the last ozone concentrations measured before the balloon burst. An underestimation of these concentrations on the order of 10% (e.g. due to freezing or evaporation of the ozonesonde solution) would lead to an underestimation of the order of 2% of the TOC. A negative bias of about 3% in the stratosphere is still necessary to explain an average normalization factor of ~~1.05~~ **1.037**.



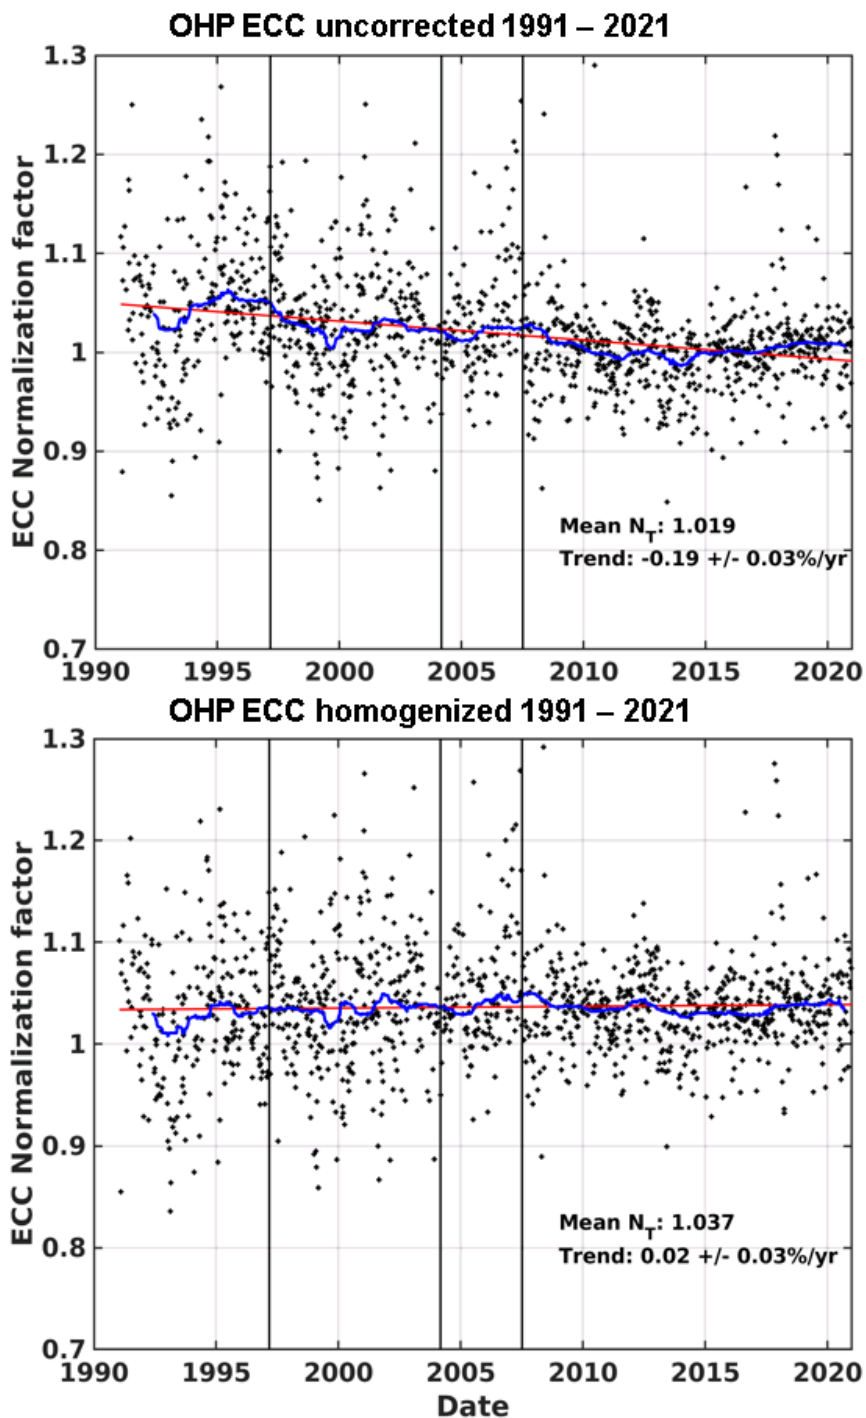

**Figure 4.** Time evolution of the OHP ECC normalization factor ( $N_T$ ) from 1991 to 2021 before (top panel) and after homogenization (bottom panel). The black lines correspond to the major ozonesonde changes in 1997, 2004 and 2007 (see Fig.2). The thick blue lines are the 100 points, centered, moving averages.  $N_T$  linear trends are shown in red, while the slope and its uncertainty with a 95% confidence are given in % per year.

## 185 4.2 Nighttime Ozonesonde/Lidar comparison

The ozone concentration vertical profiles of ECC ozonesondes launched within 2 hours of the LiO3Tr observations have been divided into six 1.5-km vertical layers between 3 and 12 km. The relative differences between the ECC and lidar O<sub>3</sub> concentration are calculated for each 1.5 km vertical bin. The mean of the relative difference and its uncertainty are then calculated for the 40 profiles, the time distribution of which is shown in Fig.3. The uncertainty of the mean difference in a  
190 1.5-km vertical interval for a single O<sub>3</sub> profile is based on mean absolute errors **uncertainties (systematic and statistical)** of both lidar and ECC measurements (see section 2 and 3) at each recorded altitude in the corresponding 1.5-km vertical interval. The **statistical standard** uncertainty of the overall mean difference is then retrieved assuming ~~an independent error for~~ **that** the 40 comparisons **are independent with uncorrelated uncertainties** ~~taken into account~~. The mean relative differences between the homogenized ECC and LiO3tr show an insignificant bias on the order of 1% for the altitude range 4.5 to 9 km considering the  
195 ~~error~~ **statistical standard uncertainty** on this difference which is on the order of  $\pm 2\%$  (Fig. 5a). The mean relative differences between the uncorrected ECC concentration and LiO3tr however show a significant bias on the order of +4% in the same altitude range. It ~~is due to the error~~ **may be explained by differences** introduced by not correcting the O<sub>3</sub> partial pressure for EnSci-SST 1% and by using a pressure dependent background current subtraction. The comparison between the altitude dependence of the **uncertainty** ~~error~~ of the lidar measurement and that of the ECC measurement in the troposphere (Fig. 5b)  
200 shows that the ECC ~~error~~ **uncertainty** remains in the range 7%-9%, while the lidar is less accurate (uncertainty > 9%) below 4.5 km and above 11 km. Below 4 km the significant bias of -4% between the homogenized ECC and the LiO3tr can be then explained by the large uncertainty on the O<sub>3</sub> retrieval by the LiO3tr (> 10%) because of the sensitivity to the overlap function correction in this altitude range. Above 10 km the large difference between lidar and ECC ( $\approx 10\%$ ) is due to different spatial resolutions for the two measurements in a region with strong O<sub>3</sub> vertical gradients and due to the increasing ~~error~~ **uncertainty**  
205 of the LiO3tr measurements in the lowermost stratosphere.

For the comparison with LiO3St, ~~the two~~ time differences between ECC launch and lidar profiling period ~~does not exceed~~ **are considered: (i) 6 hours for the 40 soundings shown in Fig.3, (ii) 12 hours for 366 soundings made between 2005-2021 during the time period of the satellite measurements shown in section 4.3.** ~~The number of profiles is again about 40 and the time distribution is shown in Fig.3.~~ The means of the relative difference between ECC and LiO3St are then calculated for 8  
210 vertical layers between 14 and 30 km **using the geometric altitude for the ECC sondes, as the geopotential altitudes become significantly larger than lidar geometrical altitudes above 25 km.** As for the previous comparison with LiO3tr, the uncertainty of the mean difference between the two instruments is retrieved assuming an independent error for the 40 **or 366** comparisons taken into account. **For the shorter time difference,** the mean relative differences between the homogenized ECC and LiO3St still show a significant bias on the order of -3% to -5% between the ECC and LiO3St ~~above 17 km~~ **at altitudes between 18 km**  
215 **and 28 km** with an error on the mean difference which is on the order of  $\pm 1.5\%$  (Fig.6a). Near 15 km, this difference decreases to less than 1%. In contrast to the LiO3Tr comparison, the mean difference between the homogenized and uncorrected ECC measurements is small ( $\approx 2\%$ ), except above 28 km where the homogenized ECC concentrations are even lower than the lidar concentrations by ~~-8%-10%~~ (Fig.6a). **For the period 2005-2021 and using a time difference less than 12 hours, the negative**

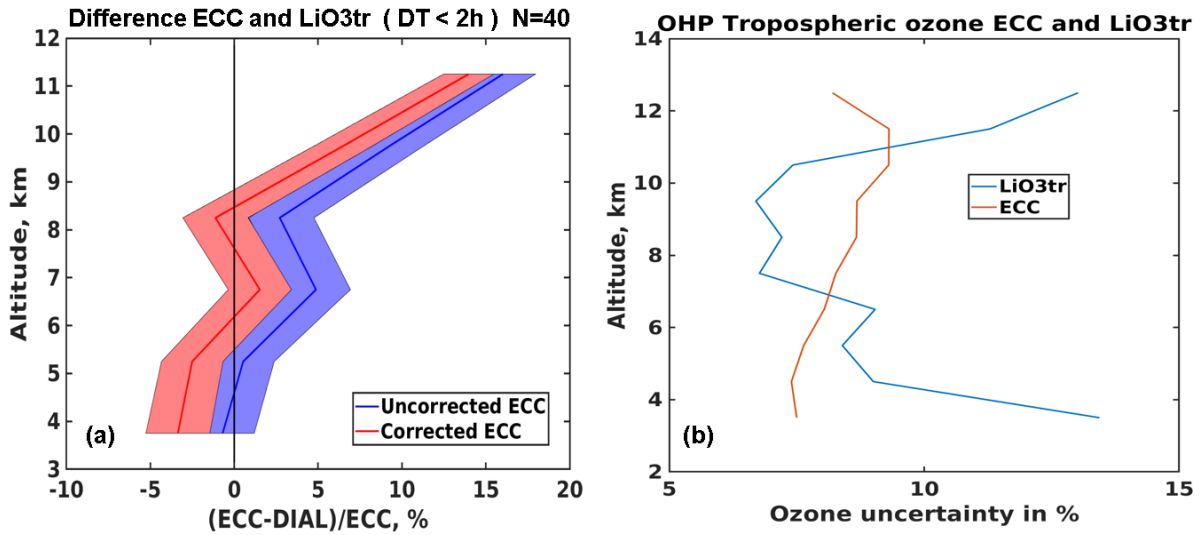

**Figure 5.** (a) Mean relative ECC - LiO3Tr ozone concentration differences in % between 3 and 12 km for uncorrected (blue) and homogenized (red) ozonesonde. Shaded areas represent the error for statistical standard uncertainty on the mean difference. (b) Vertical profiles of the median of the relative ozone concentration error for the homogenized ECC (red) and LiO3Tr (blue).

bias between the homogenized ECC and the lidar decreases down to -2% between 22 and 24 km, but remains as large as -7% above 28 km (Fig.6b). Note also that the mean uncorrected ECC and lidar difference is now slightly positive (+1%) for the 2005-2021 period in good agreement with the  $N_T$  negative trend shown in Fig.4. Below 18 km, the -4% negative bias between homogenized ECC and lidar (Fig.6b) should be interpreted by possible significant  $O_3$  concentration changes within 12 hours in this altitude range. The time evolution of the relative difference of ECC and LiO3st ozone concentrations is shown in Fig.6c and Fig.6d for uncorrected and homogenized ECC, respectively. Many of the differences between uncorrected ECC and LiO3St are greater than +6% between 2007 and 2016, while there are some negative differences approaching -6% in 2006. Homogenization improves the relative differences, now remaining between -5% and +5%, except in 2006 when the negative bias decreases down to values smaller than -6%. The comparison between the altitude dependence of the error of the lidar measurement and that of the ECC measurement in the stratosphere (Fig. 76b) shows that the ECC error remains in the range 5.5%-6.5%, while the lidar is very accurate (error <2%) between 18 km and 30 km.

Considering stratospheric lidar observations are highly accurate above 28 km in the stratosphere, frequent freezing or evaporation of the ozonesonde sensing solution may explain the ECC low bias relative to the lidar during nighttime soundings may be an explanation for the lowest performances above 28 km of the ECC launched at OHP. The  $O_3$  partial pressure error related to a pressure offset for the Vaisala RS80 period may be another reason for the large difference with LiO3St ozone values, but this error will be limited as it exists for only one third of the ECC sondes used for this comparison (25 MODEM and 15 RS80 radiosondes). When examining differences above 26 km between homogenized ECC and LiO3St for the MODEM and the RS80 subsets separately, there is indeed a larger negative bias of -4% to -10% for the RS80 than -6% to -9% for the

MODEM. We have also considered two subsets with ECC pump temperature  $T_i$  at 30 km either higher or lower than 290 K. The negative bias between the homogenized ECC and LiO3St  $O_3$  concentrations above 26 km remains greater than **decreases down to -3%** for the high  $T_i$  subset while it ranges from **-5% to -7%** to **-7% to -9%** for the low  $T_i$  subset. More investigations are  
240 needed to conclude that freezing or evaporation of the solution is indeed the major **uncertainty contributor to the negative bias of the ECC concentration measurements** above 26 km.

The **-2% to -4%** difference between LiO3St and the homogenized ECC in the **altitude range 19-27 km** stratosphere even after homogenization is consistent with the mean normalization factor of **1.037** shown in Fig. 41.05 discussed in the previous section. Indeed, the means of the relative difference between LiO3St and ECC are no longer significant below 28 km when the  
245 ECC concentrations are multiplied by the normalization factor (black curve in Fig. 6a). Note however that such a correction is not recommended for the **tropospheric ECC ozonesonde** measurements (Smit and Thompson, 2021).

### 4.3 Comparison Ozonesonde/Satellite

The comparison of satellite and ECC measurements covers a period from 2005 to 2021. ~~In contrast with the ECC lidar/comparison all the ECC sondes have been used to calculate the ozone differences between the satellite observations and the ECC measurements.~~  
250 The vertical profiles of the relative differences **of  $O_3$  concentrations between ECC and MLS** are shown in Fig. 8 in the stratosphere from 20 km (50 hPa) to 31 km (10 hPa). The ozonesonde data are first averaged to 100 m vertical resolution and then interpolated onto the MLS pressure levels. While many differences exceed 5% when the ECC data are uncorrected especially between 2010 and 2015, the relative differences for the homogenized ECC data remain within the  $\pm 5\%$  interval. Above 28 km (15 hPa) we find a negative bias **with values lower than -6%** reaching **-10%** when the ECC are homogenized. ~~The differences between 20 and 28 km for the time period corresponding to the lidar/ECC comparison of section 4.2 (July 2017, March 2018, after May 2020) are within the  $\pm 5\%$  interval. The ECC/MLS comparison is then consistent with the results obtained in section 4.2 with the comparison ECC/LiO3St.~~ An interesting feature of this MLS/ECC comparison is the interannual variability of the differences. It can be observed that differences using homogenized ECC data are more evenly distributed around zero. **The same conclusion could be drawn from the time evolution of the relative differences between homogenized ECC and LiO3St**  
260 **presented in Fig. 6c,d. The fact that the average ECC-MLS difference shown in Fig. 6b is slightly positive (+2%) in the 22-26 km altitude range, while the average ECC-LiO3St difference is slightly negative (-2%) means that homogenization is a good compromise for intercomparability with other techniques measuring  $O_3$  in the stratosphere below 26 km. Above 26 km, both comparisons indicate a negative bias in homogenized ECC  $O_3$  concentrations with values lower than -6%.**

The time distribution of differences between the ECC TOC and the satellite TOC are shown in Fig. 9. No filtering for clouds  
265 or distance is applied to have more comparisons available. The 100 point centered moving averages are superimposed on the set of data points corresponding to each single comparison. As expected, the results are consistent with comparison between ECC and stratospheric MLS profiles with the largest positive relative differences between uncorrected ECC and satellite TOC between 2010 and 2015. ~~No~~ **A small post 2013 drop-off in TOC measurement of -2% by the ECC is seen at OHP might be present, but is considerably less prominent than the drop-off** as observed at other measurement sites in Stauffer et al.  
270 (2020). The uncorrected ECC and OMI/OMPS biases range between -1% to +5% while it is between 0 and +3% for GOME.

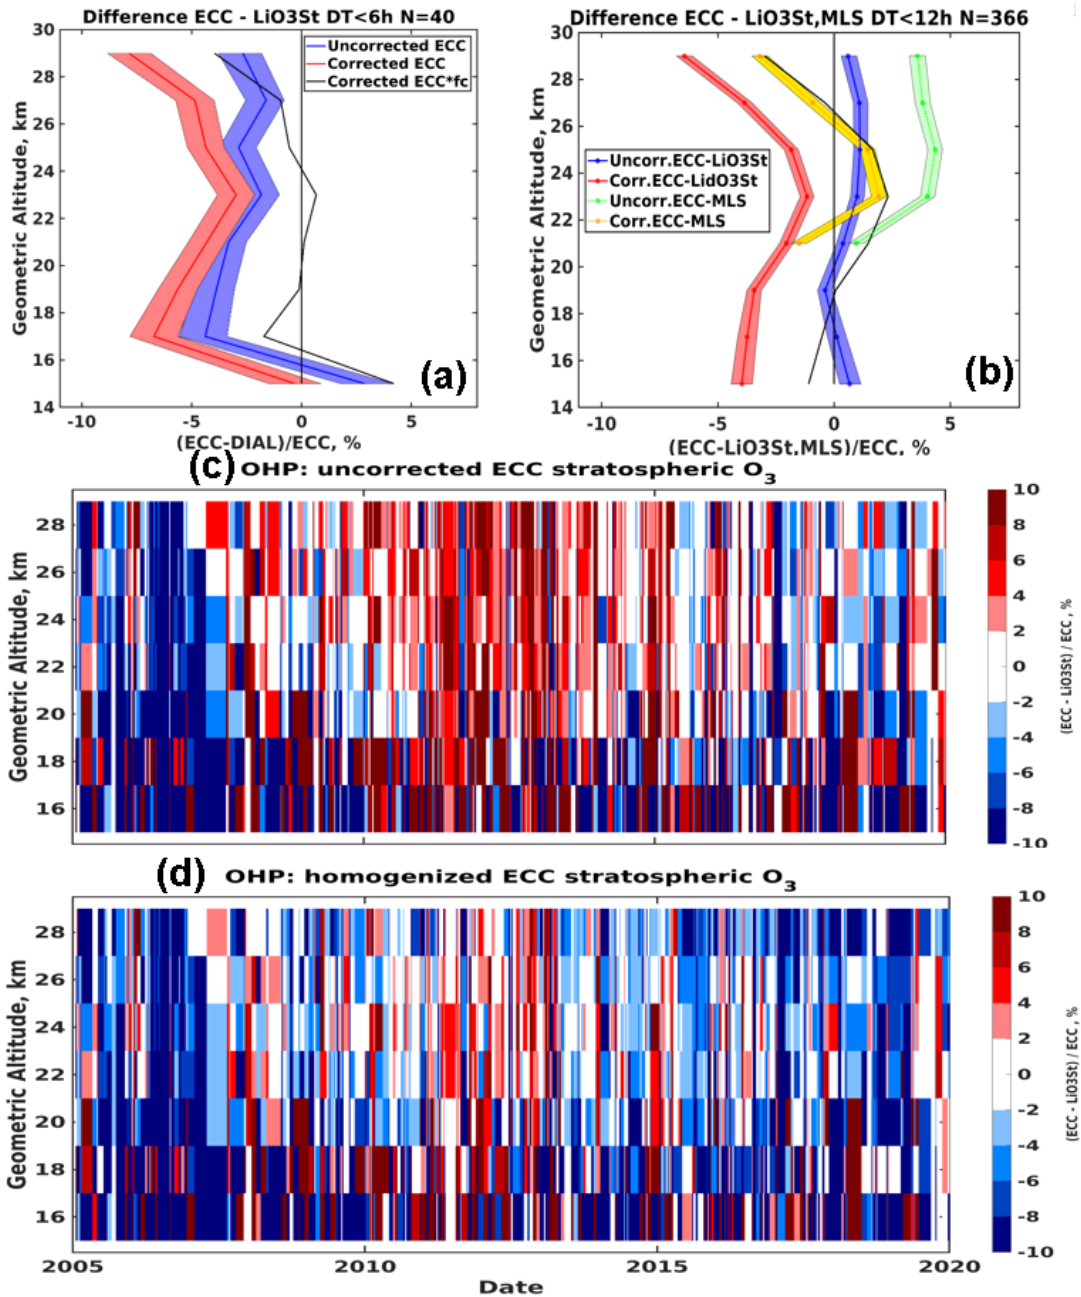

**Figure 6.** Mean relative ECC - LiO3St O<sub>3</sub> concentration differences in % between 14 and 30 km for uncorrected (blue) and homogenized (red) ECC for (a) the 40 coincident (<6h) profiles (see Fig. 3) and (b) the 366 profiles within 12 h during the MLS measurement period. Shaded areas represent the standard uncertainty error on the mean difference. The solid black line shows the mean relative differences if the homogenized ECC concentrations are multiplied by  $N_T$ . The mean relative ECC - MLS O<sub>3</sub> concentration differences are shown in (b) for uncorrected (green) and homogenized (yellow) ozonesonde. The time evolution of the relative ECC - LiO3St O<sub>3</sub> concentration differences in % are shown in (c) for uncorrected and (d) for homogenized ECC using the 366 profiles with a 12 h time difference (b) Vertical profiles of the median of the relative ozone concentration error in the troposphere for the homogenized ECC (red) and LiO3St (blue).

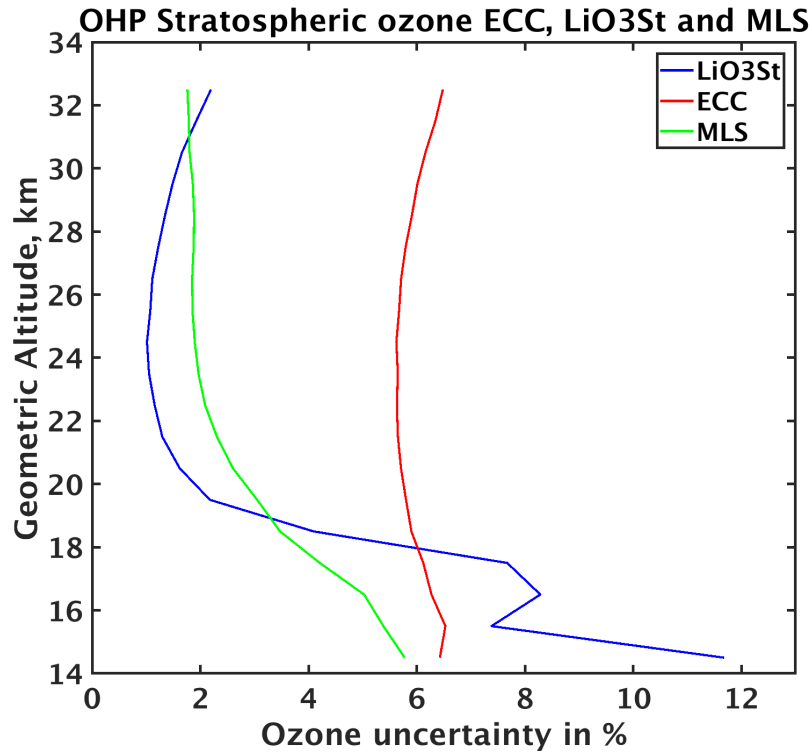

**Figure 7.** Vertical profiles of the median of the relative ozone concentration overall uncertainty in the stratosphere for the homogenized ECC (red), LiO3St (blue) and MLS (green) .

Those differences are mostly negative and between  $-4\%$ - $3\%$  and  $1\%$  after homogenization. The ECC minus satellite TOC comparison temporal evolution is consistent with the time distribution of the normalization factor shown in Fig.4. However TOC differences are close to zero between 2010 and 2016 using the satellite data, while a  $-3\%$  bias is present using the OHP total ozone measurement. In this context, we mention that the expected bias between GOME and SAOZ is between  $-3\%$  to  $+1\%$  (Hendrick et al., 2011).

#### 4.4 Comparison of trend analysis

##### 4.4.1 Surface trend

First, the inter-annual variation of homogenized and uncorrected ECC  $O_3$  concentrations have been retrieved in the lowermost troposphere (200-m layer above ground level) using the average ECC ozone concentrations in this layer. Such an inter-annual variation can be compared with the one deduced from the surface ozone measurements made since 1998. To quantify the 22-years trend of ozone mixing ratio associated with this inter-annual variation, the latter is deseasonalised by subtracting from the surface mixing ratios the monthly averages calculated over the 22 years of data. This removes a major source of  $O_3$

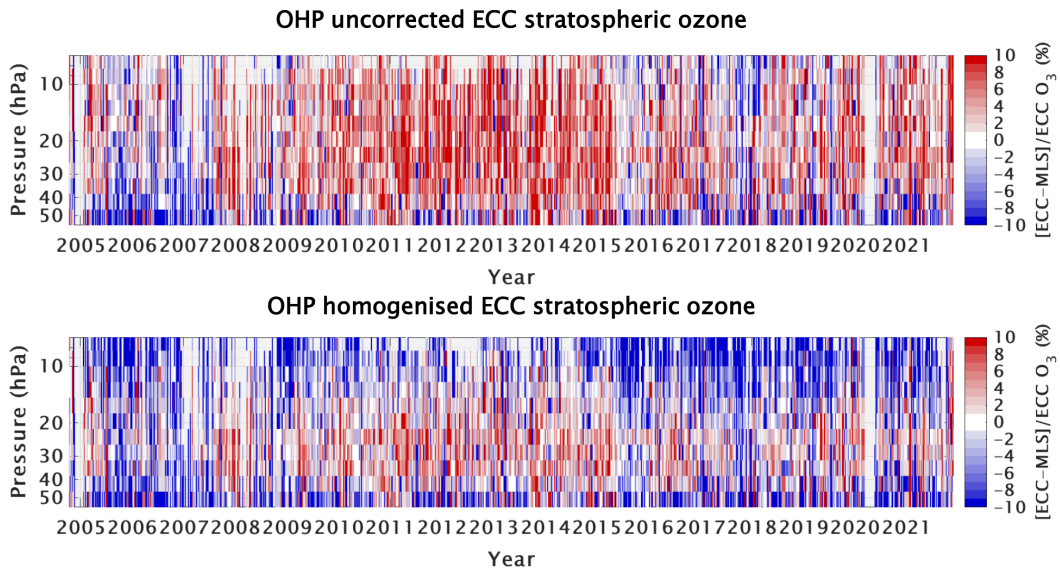

**Figure 8.** Relative O<sub>3</sub> concentration differences in % between ECC and MLS as a function pressure between 50 and 7 hPa before (top) and after (bottom) homogenization

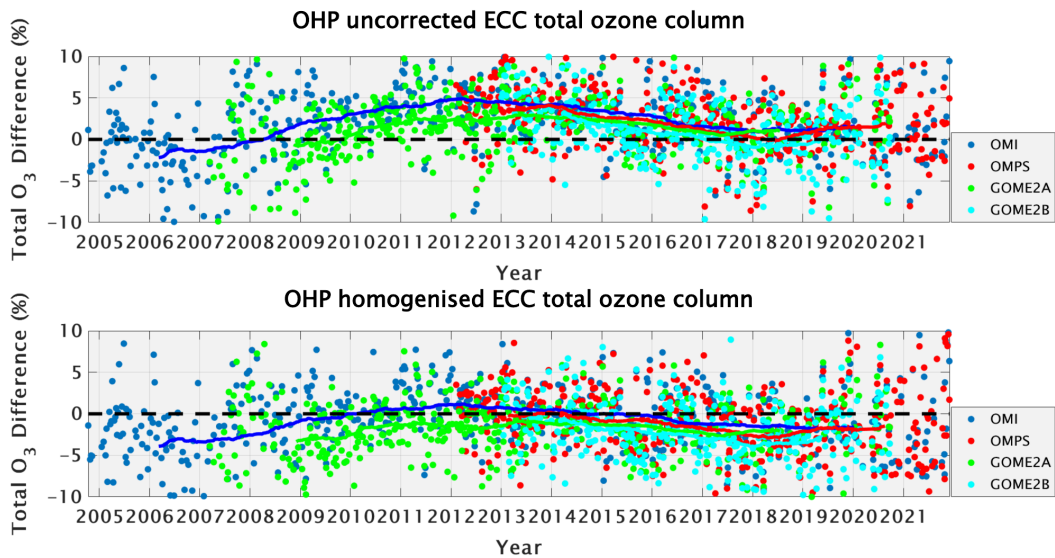

**Figure 9.** Relative differences between ECC and satellite and ECC-total ozone column before (top) and after (bottom) homogenization. The thick lines are 100 points, centered, moving averages. No moving averages are plotted for less than 100 points.

mixing ratio intra-annual variability which is on the order of 20 ppbv. The trends of the ozone mixing ratio and their 95% confidence interval estimates are calculated using the regression lines across all the available deseasonalised mixing ratios. A weak negative trend on the order of  $-1.3 \pm 0.9$  ppbv/decade is obtained for the uncorrected ECC deseasonalised mixing ratio (called ozone anomalies hereafter) and this trend changes very little ( $-1.1 \pm 0.7$  ppbv/decade) after homogenization of the ECC (Fig.10). The ECC negative ozone trends compare very well with those obtained from surface measurements using either all the  $O_3$  daily means between 1998 and 2021 ( $-1.3 \pm 0.2$  ppbv/decade) or only the hourly means for ECC launching times ( $-1.1 \pm 0.6$  ppbv/decade). The small difference between the trend calculated for all the surface daily means available and the trend using only the ECC launching times shows that the sensitivity of the trend magnitude to the sampling by ECC is not so large. The negligible difference between the uncorrected ECC trend and the homogenized ECC trend near the surface is mainly due to the fact that identical corrections are applied for all the data in the 1998-2021 period, namely (i) the scaling of EnSci-SST 1% response to the SPC-SST 1% , (ii) the pump flow rate correction and (iii) the removal of  $I_b$  pressure dependency. The difference of  $11.2 \pm 3$  ppbv between the 2003 positive yearly average of ozone anomalies and the 2005-2008 negative yearly anomalies for the uncorrected ECC (Fig.10) is however slightly reduced to  $7.89$  ppbv for the homogenized ECC (Fig.10). The difference between the positive 2003 yearly average of ozone anomalies and the negative one for 2008 does not exceed 8 ppbv for the surface measurements (Fig.10), therefore in better agreement with the homogenized ECC inter-annual variations.

#### 4.4.2 Tropospheric trend

In this section, the inter-annual variation of homogenized and uncorrected ECC ozone are compared in the free troposphere for three layers of 2-km thickness at 5 km, 7 km and just below the dynamical tropopause taken at 2 PV units (Fig.11). The three layers were selected in order to compare the ozone trends of the ECC sondes with those of the LiO3tr lidar. The mean altitude  $Z_{tp}$  of the dynamical tropopause is calculated using ECMWF meteorological analysis with 1° horizontal resolution and 137 vertical levels. The mean value of  $Z_{tp}$  is 10.5 km at OHP (10 km in winter and 11.5 km in summer), so the upper layer approximately corresponds to the 8 km to 10 km altitude range. As for the surface trend retrieval, the mean ozone concentrations of the layers are deseasonalised before calculating the trends of mixing ratios from the regression lines across all the 2-km ozone mixing ratio averages available in the 30-year database. The uncorrected ECC trends are always positive and significant and they increase with altitude, with the largest value ( $4.4 \pm 0.8$  ppbv/decade) in the layer below the tropopause (Table 1). The lidar measurements also show significant positive trends for the 3 layers but with smaller values, e.g.  $3.1 \pm 0.9$  ppbv/decade below the tropopause. The lidar trends are in better agreement with the trends calculated using the homogenized values, e.g.  $3.2 \pm 0.8$  ppbv/decade below the tropopause. Although the lidar and homogenized ECC yearly average of ozone anomalies are not similar from year to year considering the sampling differences, the main decennial changes are seen by both instruments above 6 km, namely the sign change of the anomalies between the period 2000-2010 (positive) and 2010-2020 (negative)(Fig.11). Overall the homogenization greatly improved the ECC tropospheric trend retrieval with smaller and more realistic values.



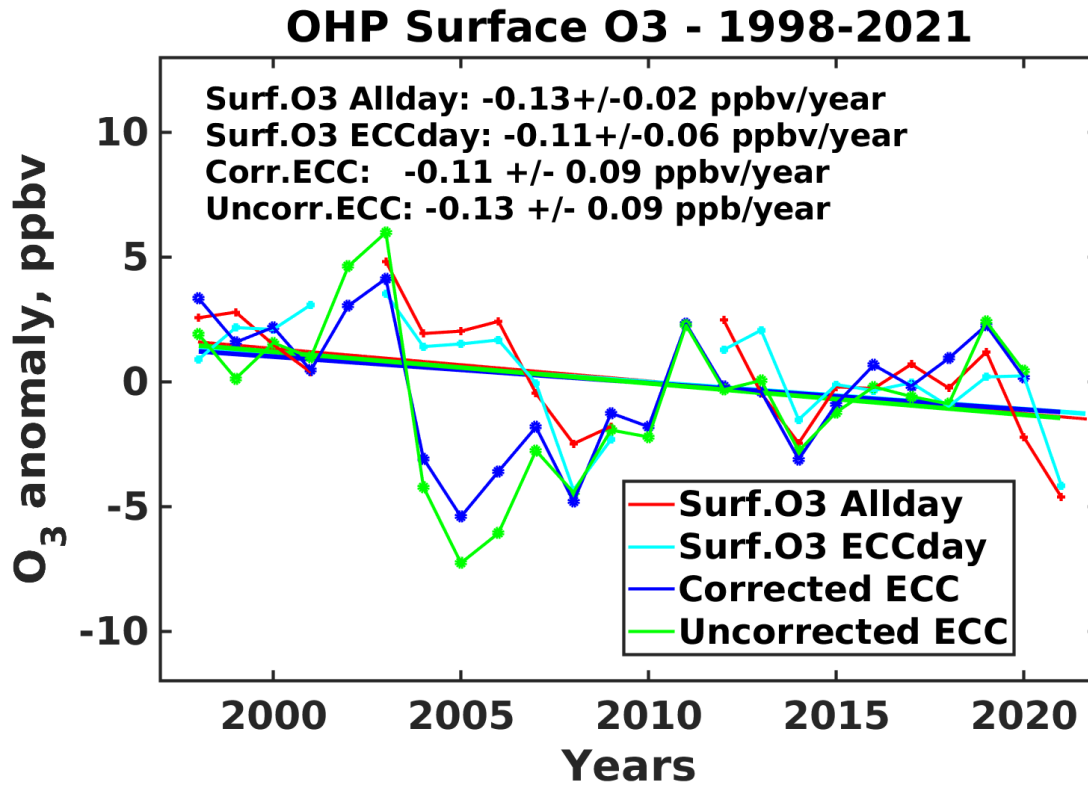

**Figure 10.** Interannual variation of deseasonalised O<sub>3</sub> mixing ratios in ppbv for the uncorrected ECC (greenA), homogenized ECC (blueB) and daily mean observations of the OHP surface O<sub>3</sub> analyser (bottom). The ECC mixing ratio are averaged in the 0.2-km layer above the surface. The surface daily mean observations are calculated when available (redC) or for ECC launching days only (cyanD). Blue circles are the annual medians of the deseasonalised O<sub>3</sub> anomalies with their standard deviation, while the red line represents the corresponding regression lines through all the O<sub>3</sub> anomalies between 1998 and 2021, O<sub>3</sub> trends in ppbv/year and their uncertainties with a 95% confidence are also shown in each panel.

**Table 1.** Tropospheric trends and their confidence limits for lidar, uncorrected ECC and homogenized ECC. Last column corresponds to the 2-km layer just below the altitude of the dynamical tropopause ( $Z_{tp}$ )

| Altitude range              | 4 to 6 km | 6 to 8 km | $Z_{tp} - 2 \text{ km to } Z_{tp}$ |
|-----------------------------|-----------|-----------|------------------------------------|
| LiO <sub>3</sub> Tr ppbv/yr | 0.10±0.05 | 0.11±0.06 | 0.31±0.09                          |
| Uncorrected                 |           |           |                                    |
| ECC, ppbv/yr                | 0.16±0.05 | 0.24±0.08 | 0.44±0.08                          |
| Homogenized                 |           |           |                                    |
| ECC, ppbv/yr                | 0.07±0.05 | 0.14±0.08 | 0.32±0.08                          |

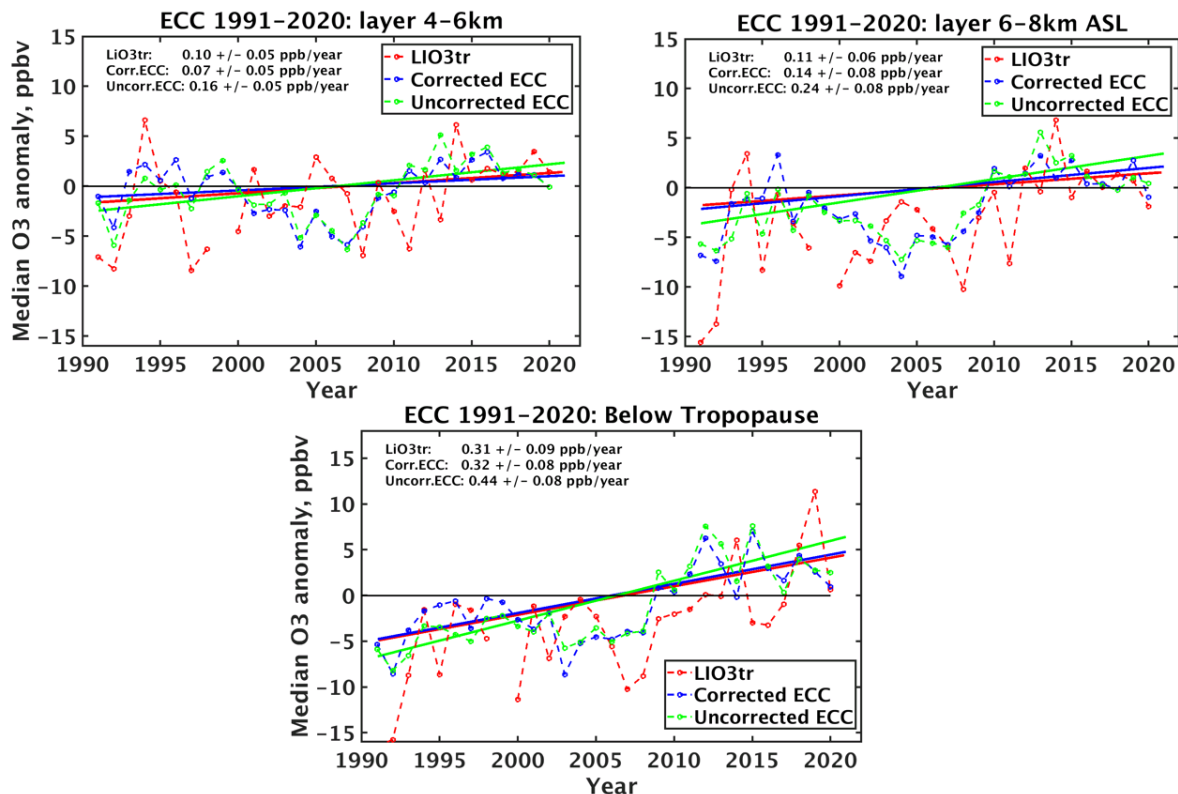

**Figure 11.** Interannual variation of deseasonalised O<sub>3</sub> mixing ratios in ppbv for the uncorrected ECC (green top row), homogenized ECC (blue middle row) and LiO3Tr (red bottom row) and for 3 altitude ranges in the troposphere: 4-6 km (top left column), 6-8 km (top right middle column) and the 2-km range below the 2 PVu dynamical tropopause (bottom right column). Blue circles are the annual medians of the deseasonalised O<sub>3</sub> anomalies with their standard deviation, while the red line represents the regression lines through all the O<sub>3</sub> anomalies between 1991 and 2020, O<sub>3</sub> trends in ppbv/year and their uncertainties with a 95% confidence are also shown in each panel.

### 315 4.4.3 Stratospheric trend

Here the interannual variation of homogenized and uncorrected ECC ozone are compared in the stratosphere for three layers of 2-km thickness at 19 km, 25 km and 29 km (Fig.12). The three layers were selected to be able to compare the ozone trends of the ECC sondes with those of the LiO3St lidar. The methodology developed for the surface and tropospheric ozone trends has been applied on the ozone concentrations given in molecules.cm<sup>-3</sup> which is the primary unit used by the LiO3St for the ozone retrieval (Leblanc et al., 2016). The uncorrected ECC trends shown in Table 2 are always positive and significant ranging from (1.8±0.4 mol.cm<sup>-3</sup>/decade to 0.7±0.2 mol.cm<sup>-3</sup>/decade), while the trends retrieved from the lidar observations are negligible and not significant within the range (-0.3±0.4 mol.cm<sup>-3</sup>/decade at 19 km to 0.20±0.2 mol.cm<sup>-3</sup>/decade at 29 km)(Tab.2). The ECC trends using the homogenized ECC are also very small within the range 0.7±0.4 mol.cm<sup>-3</sup>/decade at 19 km to 0.3±0.2 mol.cm<sup>-3</sup>/decade at 29 km. Although the trends are similar, the year-to-year variation of the homogenized

325 ECC yearly average of ozone anomalies is generally smaller than the corresponding lidar yearly average at 19 km and 29 km (Fig.12). Such differences in the range of the yearly ozone anomalies are related to a different sampling for ECC and lidar profiling, **with the lidar providing more than twice as much ozone profiles than the sondes**. The homogenization nevertheless greatly improved the stratospheric 30-years trend assessment with a better agreement with the lidar **trend analysis, the latter being** recognized as very accurate in the stratosphere **above 18 km** (Nair et al., 2011).

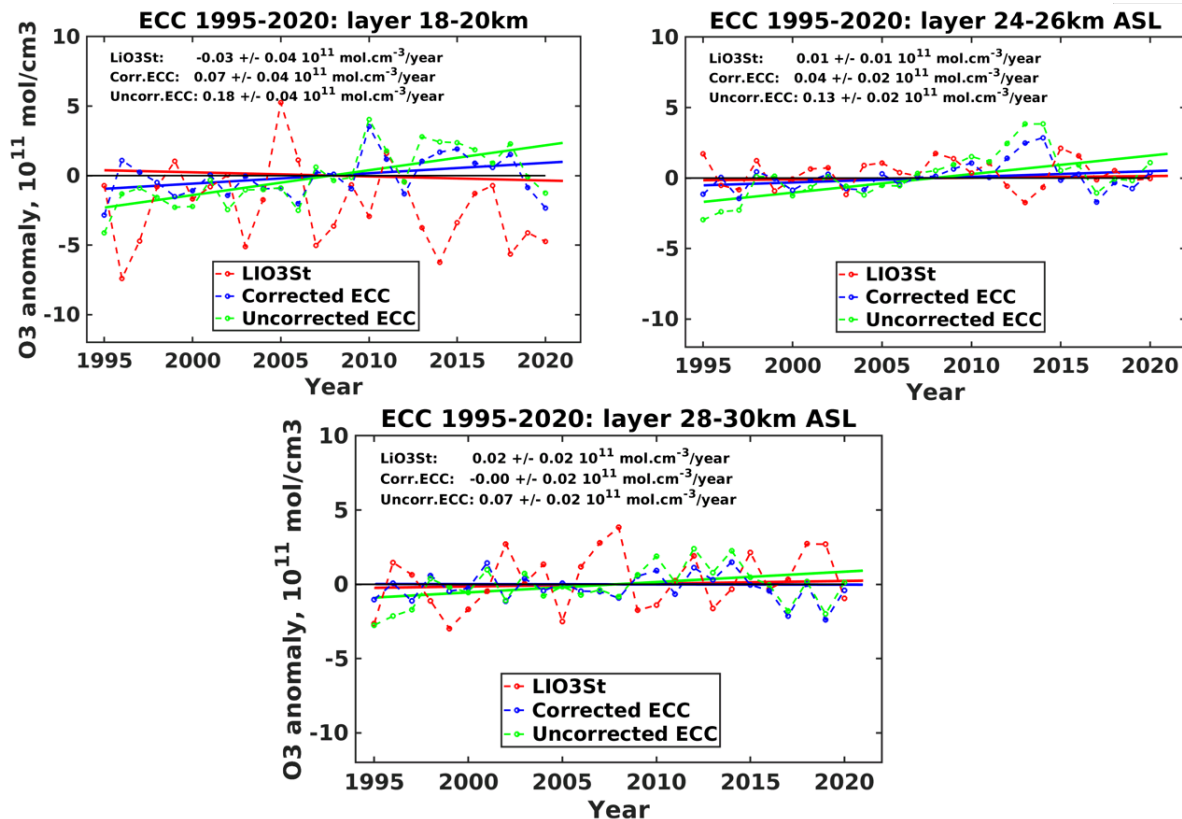

**Figure 12.** Interannual variation of deseasonalised  $\text{O}_3$  concentrations in  $\text{molecules.cm}^{-3}$  for the uncorrected ECC (green top row), homogenized ECC (blue middle row) and LiO3St (red bottom row) and for 3 altitude ranges in the stratosphere: 18-20 km (top left left column), 24-26 km (top right middle column) and 28-30 km (bottom right column). Blue circles are the annual medians of the deseasonalised  $\text{O}_3$  anomalies with their standard deviation, while the red line represents the regression lines through all the  $\text{O}_3$  anomalies between 1995 and 2020,  $\text{O}_3$  trends in  $\text{molecules.cm}^{-3}/\text{year}$  and their uncertainties with a 95% confidence are shown in each panel.

## 330 5 Conclusions

The 30-years ozone data set from weekly ECC ozone soundings has been homogenized according to the recommendations of Smit et al. (2012). The major changes are related to the change of ECC manufacturer in 1997 (SPC-SST 1% to EnSci-SST 1%),

**Table 2.** Stratospheric trends and their confidence limit for lidar, uncorrected ECC and homogenized ECC.

| Altitude range                  | 18 to 20 km | 24 to 26 km | 28 to 30 km |
|---------------------------------|-------------|-------------|-------------|
| LiO3St mol.cm <sup>-3</sup> /yr | -0.03±0.04  | 0.01±0.01   | 0.02±0.02   |
| Uncorrected                     |             |             |             |
| ECC, mol.cm <sup>-3</sup> /yr   | 0.18±0.04   | 0.13±0.02   | 0.07±0.02   |
| Homogenized                     |             |             |             |
| ECC, mol.cm <sup>-3</sup> /yr   | 0.07±0.04   | 0.04±0.02   | 0.03±0.02   |

the background current and internal sonde temperature corrections. The assessment of the OHP ECC homogenization benefit has been carried out using comparisons with ground based instruments located at the same station (lidar, surface measurements) and satellite overpass observations (MLS in the stratosphere and GOME/OMI/OMPS for the Total Ozone Column (TOC)). The major findings are:

- The 3-4 ppb positive bias of the ECC in the troposphere due to the use of uncorrected ENSCI-SST 1% and a pressure dependent  $I_b$  is corrected with the homogenization leading to a better agreement between the LiO3Tr lidar and ECC in the mid-troposphere
- The ECC trends of the seasonally adjusted ozone concentrations are significantly improved both in the troposphere and the stratosphere when the ECC concentrations are homogenized, as shown by the ECC/lidar or ECC/TEI trend comparisons.
- The negative trend of the normalization factor ( $N_T$ ) calculated using the OHP Dobson and SAOZ total column disappears thanks to the homogenization of the ECC. There is however a remaining -5% -3.7% negative bias which is likely related to an underestimate of the ECC concentrations in the stratosphere above 50 hPa as shown by comparison with the OHP LiO3St lidar and MLS (no bias between ECC and lidar when the ECC is multiplied by  $N_T$ ). The reason for this bias is still unclear and must be better understood.
- Differences between TOC measured by ECC and by GOME or OMI/OMPS switch from 2%±2% for uncorrected ECC to -2% -1%±2% for homogenized ECC. The negative bias is then smaller than the -3.7% obtained with the OHP TOC measurements, even though the time evolution is being consistent with the  $N_T$  time distribution.
- Direct comparisons of homogenized and uncorrected ECC concentrations in the stratosphere between 18 km and 3026 km show limited changes using a subset of 40 days with LiO3St and ECC measurements time difference less than 6 hours. The mean differences between in 2005 to 2021 ECC and MLS or LIO3St ozone observations using a less restrictive time coincidence < 12 hours are either slightly positive (+2%) for MLS or slightly negative (-2%) for LiO3St meaning that the homogenization is a good compromise for intercomparability of ECC with other stratospheric O<sub>3</sub> measurements below

26 km. but differences between MLS and ECC using all ozonesondes from 2005 to 2021 are more evenly distributed around zero for the homogenized time series than for the uncorrected ECC.

- Both the comparisons with lidar and satellite observations suggest that homogenization increases the negative bias of the ECC up to -10% to values lower than -6% above 26 km

360 While the objective of this paper is to discuss the impact of homogenization on the OHP dataset using lidar and satellite measurements, it is worth checking how such corrections have improved data quality at other sites. The impact of the homogenization is dependent on the site, because different homogenization steps have to be applied at different stations. In general, the additional corrections for the pump temperature will give higher ozone partial pressure amounts in the stratosphere. On the other hand, applying a constant background current subtraction instead of a pressure dependent background current and  
365 applying the transfer functions from EnSci-SST 1% will lead to lower ozone partial pressure values above 10 km. Witte et al. (2017) performed an extensive analysis of 7 SHADOZ network stations in the tropics, showing that the mean differences between ECC and MLS are reduced from  $-11.2 \pm 13.6\%$  to  $-3.0 \pm 10\%$  at 40 hPa (22 km) and from  $-3.2 \pm 4\%$  to  $-0.7 \pm 3.1\%$  at 17 hPa (28 km). In Europe, Van Malderen et al. (2016) observed that the O3S-DQA corrections actually give higher (+1%) and lower (-2%) ozone concentrations in the stratosphere with respect to standard processing for the Uccle 1997-2014 and De Bilt  
370 1993-2014 ECC observations, respectively. This is mainly due to the fact that the pump temperature correction was a major correction for Uccle, while changing the background current correction has a major effect for De Bilt. O3S-DQA corrections reduce the relative O<sub>3</sub> difference between Uccle and De Bilt in the lower stratosphere. The analysis of homogenized ECC at OHP using LiO3St or MLS show similar improvements in the stratosphere below 26 km. The remaining bias of -2% to -3.7% between homogenized ECC and other techniques measuring O<sub>3</sub> in the stratosphere at OHP is also in the range of the remaining  
375 differences between homogenized ECC and MLS observed in the 22 to 28 km altitude range by 4 stations of the SHADOZ network (Witte et al., 2017).

*Code and data availability.* OHP ECC data are available at <https://doi.org/10.25326/293>. LiO3St and LiO3Tr data are available at the NDACC web site (<https://www-air.larc.nasa.gov/missions/ndacc/data.html?station=haute.provence/ames/lidar/>) MLS/Aura Level 2 Ozone (O3) Mixing Ratio V005 are available at <https://doi.org/10.5067/Aura/MLS/DATA2516>. OMI/Aura Ozone (O3) Total Column Daily L2 are  
380 available at <https://doi.org/10.5067/Aura/OMI/DATA2025>. OMPS-NPP L2 NM Ozone (O3) Total Column L2 are available at <https://doi.org/10.5067/OWF>. GOME 2A and B are available at <http://www.eumetsat.int>. Meteorological Analysis are available at ECMWF (<http://www.ecmwf.int>). The OHP ECC homogenization code is available on request (Renaud Bodichon <[rboips1@ipsl.jussieu.fr](mailto:rboips1@ipsl.jussieu.fr)>).

*Author contributions.* G. Ancellet, S. Godin-Beekmann and H. Smit proposed the study. HS and R. Van Marderen provided the guidelines for the homogenization of the OHP ECC. R. Bodichon wrote the homogenization software for the OHP ECC. GA, SGB and A. Pazmino  
385 provided the OHP lidar and SAOZ data. GA carried out the analysis and wrote the paper. R. Stauffer carried out the comparison of ECC and satellite data. All the authors contributed to discussion and feedback essential to the study.

*Competing interests.* No competing interests are present

*Acknowledgements.* The work was supported by CNRS-INSU and ACTRIS through the project NDACC-France. The technical staff of Observatoire de Haute Provence is gratefully acknowledged for carrying out the lidar measurements and ECC ozone soundings. We ac-  
390 knowledge the European Centre for Medium Range Weather Forecasts (ECMWF) for providing meteorological reanalysis for lidar data processing and dynamical tropopause altitude calculation. The authors acknowledge the NASA/GSFC AURA Validation Data Center for providing the satellite data used in this paper (MLS, GOME, OMI, OMPS)

## References

- 395 Ancellet, G. and Beekmann, M.: Evidence for changes in the ozone concentrations in the free troposphere over southern France from 1976 to 1995, *Atmospheric Environment*, 31, 2835–2851, [https://doi.org/10.1016/S1352-2310\(97\)00032-0](https://doi.org/10.1016/S1352-2310(97)00032-0), 1997.
- Ancellet, G. and Ravetta, F.: On the usefulness of an airborne lidar for O<sub>3</sub> layer analysis in the free troposphere and the planetary boundary layer, *J. Environ. Monit.*, 5, 47–56, <https://doi.org/10.1039/B205727A>, 2003.
- 400 Beekmann, M., Ancellet, G., Megie, G., Smit, H., and Kley, D.: Intercomparison campaign for vertical ozone profiling in the troposphere at the Observatoire de Haute Provence, 1989: electrochemical sondes of ECC and Brewer-Mast type and a ground-based UV-DIAL lidar, *J. Atmos. Chem.*, 19, 259–288, <https://doi.org/10.1007/BF00694614>, 1994.
- Chang, K.-L., Cooper, O. R., Gaudel, A., Petropavlovskikh, I., and Thouret, V.: Statistical regularization for trend detection: an integrated approach for detecting long-term trends from sparse tropospheric ozone profiles, *Atmospheric Chemistry and Physics*, 20, 9915–9938, <https://doi.org/10.5194/acp-20-9915-2020>, 2020.
- 405 Cohen, Y., Petetin, H., Thouret, V., Maréchal, V., Josse, B., Clark, H., Sauvage, B., Fontaine, A., Athier, G., Blot, R., Boulanger, D., Cousin, J.-M., and Nédélec, P.: Climatology and long-term evolution of ozone and carbon monoxide in the upper troposphere–lower stratosphere (UTLS) at northern midlatitudes, as seen by IAGOS from 1995 to 2013, *Atmospheric Chemistry and Physics*, 18, 5415–5453, <https://doi.org/10.5194/acp-18-5415-2018>, 2018.
- Deshler, T., Stübi, R., Schmidlin, F. J., Mercer, J. L., Smit, H. G. J., Johnson, B. J., Kivi, R., and Nardi, B.: Methods to homogenize electrochemical concentration cell (ECC) ozonesonde measurements across changes in sensing solution concentration or ozonesonde manufacturer, *Atmospheric Measurement Techniques*, 10, 2021–2043, <https://doi.org/10.5194/amt-10-2021-2017>, 2017.
- 410 Froidevaux, L., Jiang, Y. B., Lambert, A., Livesey, N. J., Read, W. G., Waters, J. W., Browell, E. V., Hair, J. W., Avery, M. A., McGee, T. J., Twigg, L. W., Summicht, G. K., Jucks, K. W., Margitan, J. J., Sen, B., Stachnik, R. A., Toon, G. C., Bernath, P. F., Boone, C. D., Walker, K. A., Filipiak, M. J., Harwood, R. S., Fuller, R. A., Manney, G. L., Schwartz, M. J., Daffer, W. H., Drouin, B. J., Cofield, R. E., Cuddy, D. T., Jarnot, R. F., Knosp, B. W., Perun, V. S., Snyder, W. V., Stek, P. C., Thurstans, R. P., and Wagner, P. A.: Validation of Aura Microwave Limb Sounder stratospheric ozone measurements, *Journal of Geophysical Research: Atmospheres*, 113, n/a–n/a, <https://doi.org/10.1029/2007JD008771>, d15S20, 2008.
- 420 Gaudel, A., Cooper, O., Ancellet, G., Barret, B., Boynard, A., Burrows, J., Clerbaux, C., Coheur, P.-F., Cuesta, J., Cuevas, E., Doniki, S., Dufour, G., Ebojje, F., Foret, G., Garcia, O., Granados Muñoz, M., Hannigan, J., Hase, F., Huang, G., Hassler, B., Hurtmans, D., Jaffe, D., Jones, N., Kalabokas, P., Kerridge, B., Kulawik, S., Latter, B., Leblanc, T., Le Flochmoën, E., Lin, W., Liu, J., Liu, X., Mahieu, E., McClure-Begley, A., Neu, J., Osman, M., Palm, M., Petetin, H., Petropavlovskikh, I., Querel, R., Raipoe, N., Rozanov, A., Schultz, M., Schwab, J., Siddans, R., Smale, D., Steinbacher, M., Tanimoto, H., Tarasick, D., Thouret, V., Thompson, A., Trickl, T., Weatherhead, E., Wespes, C., Worden, H., Vigouroux, C., Xu, X., Zeng, G., and Ziemke, J.: Tropospheric Ozone Assessment Report: Present-day distribution and trends of tropospheric ozone relevant to climate and global atmospheric chemistry model evaluation, *Elem Sci Anth.*, 6, 39–96, <https://doi.org/10.1525/elementa.291>, 2018.
- 425 Godin-Beekmann, S., Porteneuve, J., and Garnier, A.: Systematic DIAL lidar monitoring of the stratospheric ozone vertical distribution at Observatoire de Haute-Provence (43.92°N, 5.71°E), *Journal of Environmental Monitoring*, 5, 57–67, <https://doi.org/10.1039/B205880D>, 2002.

- Hendrick, F., Pommereau, J.-P., Goutail, F., Evans, R. D., Ionov, D., Pazmino, A., Kyrö, E., Held, G., Eriksen, P., Dorokhov, V., Gil, M., and Van Roozendaal, M.: NDACC/SAOZ UV-visible total ozone measurements: improved retrieval and comparison with correlative ground-based and satellite observations, *Atmospheric Chemistry and Physics*, 11, 5975–5995, <https://doi.org/10.5194/acp-11-5975-2011>, 2011.
- 430 Komhyr, W. D.: Operations handbook-ozone measurements to 40-km altitude with Model 4A Electrochemical Concentration Cell (ECC) ozonesondes (used with 1680-MHz radiosondes), 1986.
- Leblanc, T., Sica, R. J., van Gijssel, J. A. E., Godin-Beekmann, S., Haefele, A., Trickl, T., Payen, G., and Liberti, G.: Proposed standardized definitions for vertical resolution and uncertainty in the NDACC lidar ozone and temperature algorithms – Part 2: Ozone DIAL uncertainty budget, *Atmospheric Measurement Techniques*, 9, 4051–4078, <https://doi.org/10.5194/amt-9-4051-2016>, 2016.
- 435 Liu, G., Liu, J., Tarasick, D. W., Fioletov, V. E., Jin, J. J., Moeini, O., Liu, X., Sioris, C. E., and Osman, M.: A global tropospheric ozone climatology from trajectory-mapped ozone soundings, *Atmospheric Chemistry and Physics*, 13, 10659–10675, <https://doi.org/10.5194/acp-13-10659-2013>, 2013.
- McPeters, R. D. and Labow, G. J.: Climatology 2011: An MLS and sonde derived ozone climatology for satellite retrieval algorithms, *Journal of Geophysical Research: Atmospheres*, 117, <https://doi.org/https://doi.org/10.1029/2011JD017006>, 2012.
- 440 Nair, P. J., Godin-Beekmann, S., Pazmiño, A., Hauchecorne, A., Ancellet, G., Petropavlovskikh, I., Flynn, L. E., and Froidevaux, L.: Coherence of long-term stratospheric ozone vertical distribution time series used for the study of ozone recovery at a northern mid-latitude station, *Atmospheric Chemistry and Physics*, 11, 4957–4975, <https://doi.org/10.5194/acp-11-4957-2011>, 2011.
- Nair, P. J., Godin-Beekmann, S., Kuttippurath, J., Ancellet, G., Goutail, F., Pazmiño, A., Froidevaux, L., Zawodny, J. M., Evans, R. D., Wang, H. J., Anderson, J., and Pastel, M.: Ozone trends derived from the total column and vertical profiles at a northern mid-latitude station, *Atmospheric Chemistry and Physics*, 13, 10373–10384, <https://doi.org/10.5194/acp-13-10373-2013>, 2013.
- 445 Petkov, B. H., Vitale, V., Tomasi, C., Siani, A. M., Seckmeyer, G., Webb, A., Smedley, A. R. D., Rocco Casale, G., Werner, R., Lanconelli, C., Mazzola, M., Lupi, A., Busetto, M., Diémoz, H., Goutail, F., Köhler, U., Mendeva, B. T., Josefsson, W., Moore, D., López Bartolomé, M., Moret González, J. R., Mišaga, O., Dahlback, A., Tóth, Z., Varghese, S., De Backer, H., Stübi, R., and Vaníček, K.: Response of the ozone column over Europe to the 2011 Arctic ozone depletion event according to ground-based observations and assessment of the consequent variations in surface UV irradiance, *Atmospheric Environment*, 85, 169–178, <https://doi.org/10.1016/j.atmosenv.2013.12.005>, 2014.
- 450 Richards, N. A. D., Arnold, S. R., Chipperfield, M. P., Miles, G., Rap, A., Siddans, R., Monks, S. A., and Hollaway, M. J.: The Mediterranean summertime ozone maximum: global emission sensitivities and radiative impacts, *Atmospheric Chemistry and Physics*, 13, 2331–2345, <https://doi.org/10.5194/acp-13-2331-2013>, 2013.
- 455 Smit, H. and Thompson, A.: GAW report 268 Ozonesonde Measurement Principles and Best Operational Practices: ASOPOS 2.0 (Assessment of Standard Operating Procedures for Ozonesondes), [https://library.wmo.int/doc\\_num.php?explnum\\_id=10884](https://library.wmo.int/doc_num.php?explnum_id=10884), 2021.
- Smit, H., Oltmans, S., Deshler, T., Tarasick, D., Johnson, B., Schmidlin, F., Stuebi, R., and Davies, J.: SI2N/O3S-DQA activity: Guidelines for homogenization of ozone sonde data, Activity as part of SPARC-IGACO-IOC Assessment (SI2N) "Past Changes In The Vertical Distribution Of Ozone Assessment", [http://www-das.uwyo.edu/~deshler/NDACC\\_O3Sondes/O3s\\_DQA/O3S-DQA-Guidelines%20Homogenization-V2-19November2012.pdf](http://www-das.uwyo.edu/~deshler/NDACC_O3Sondes/O3s_DQA/O3S-DQA-Guidelines%20Homogenization-V2-19November2012.pdf), 2012.
- 460 Stauffer, R. M., Morris, G. A., Thompson, A. M., Joseph, E., Coetzee, G. J. R., and Nalli, N. R.: Propagation of radiosonde pressure sensor errors to ozonesonde measurements, *Atmospheric Measurement Techniques*, 7, 65–79, <https://doi.org/10.5194/amt-7-65-2014>, 2014.
- 465 Stauffer, R. M., Thompson, A. M., Kollonige, D. E., Witte, J. C., Tarasick, D. W., Davies, J., Vömel, H., Morris, G. A., Van Malderen, R., Johnson, B. J., Querel, R. R., Selkirk, H. B., Stübi, R., and Smit, H. G. J.: A Post-2013 Dropoff in Total Ozone at a Third of Global



- Ozonesonde Stations: Electrochemical Concentration Cell Instrument Artifacts ?, *Geophysical Research Letters*, 47, e2019GL086791, <https://doi.org/https://doi.org/10.1029/2019GL086791>, 2020.
- 470 Szelag, M. E., Sofieva, V. F., Degenstein, D., Roth, C., Davis, S., and Froidevaux, L.: Seasonal stratospheric ozone trends over 2000–2018 derived from several merged data sets, *Atmospheric Chemistry and Physics*, 20, 7035–7047, <https://doi.org/10.5194/acp-20-7035-2020>, 2020.
- Tarasick, D. W., Smit, H. G. J., Thompson, A. M., Morris, G. A., Witte, J. C., Davies, J., Nakano, T., Van Malderen, R., Stauffer, R. M., Johnson, B. J., Stübi, R., Oltmans, S. J., and Vömel, H.: Improving ECC Ozonesonde Data Quality: Assessment of Current Methods and Outstanding Issues, *Earth and Space Science*, 8, e2019EA000914, <https://doi.org/https://doi.org/10.1029/2019EA000914>, 2021.
- 475 Thompson, A. M., Stauffer, R. M., Wargan, K., Witte, J. C., Kollonige, D. E., and Ziemke, J. R.: Regional and Seasonal Trends in Tropical Ozone From SHADOZ Profiles: Reference for Models and Satellite Products, *Journal of Geophysical Research: Atmospheres*, 126, e2021JD034691, <https://doi.org/https://doi.org/10.1029/2021JD034691>, 2021.
- Thornton, D. C. and Niazy, N.: Effects of solution mass transport on the ECC ozonesonde background current, *Geophysical Research Letters*, 10, 97–100, <https://doi.org/https://doi.org/10.1029/GL010i001p00097>, 1983.
- 480 Van Malderen, R., Allaart, M. A. F., De Backer, H., Smit, H. G. J., and De Muer, D.: On instrumental errors and related correction strategies of ozonesondes: possible effect on calculated ozone trends for the nearby sites Uccle and De Bilt, *Atmospheric Measurement Techniques*, 9, 3793–3816, <https://doi.org/10.5194/amt-9-3793-2016>, 2016.
- Van Roozendael, M., Peeters, P., Roscoe, H. K., De Backer, H., Jones, A. E., Bartlett, L., Vaughan, G., Goutail, F., Pommereau, J.-P., Kyro, E., Wahlstrom, C., Braathen, G., and Simon, P. C.: Validation of Ground-Based Visible Measurements of Total Ozone by Comparison with Dobson and Brewer Spectrophotometers, *Journal of Atmospheric Chemistry*, 29, 55–83, <https://doi.org/10.1023/A:1005815902581>, 485 1998.
- Vömel, H. and Diaz, K.: Ozone sonde cell current measurements and implications for observations of near-zero ozone concentrations in the tropical upper troposphere, *Atmospheric Measurement Techniques*, 3, 495–505, <https://doi.org/10.5194/amt-3-495-2010>, 2010.
- Witte, J. C., Thompson, A. M., Smit, H. G. J., Fujiwara, M., Posny, F., Coetzee, G. J. R., Northam, E. T., Johnson, B. J., Sterling, C. W., Mohamad, M., Ogino, S.-Y., Jordan, A., and da Silva, F. R.: First reprocessing of Southern Hemisphere ADditional OZonesondes (SHADOZ) profile records (1998–2015): 1. Methodology and evaluation, *Journal of Geophysical Research: Atmospheres*, 122, 6611–6636, <https://doi.org/https://doi.org/10.1002/2016JD026403>, 2017.
- 490 Witte, J. C., Thompson, A. M., Smit, H. G. J., Vömel, H., Posny, F., and Stübi, R.: First Reprocessing of Southern Hemisphere ADditional OZonesondes Profile Records: 3. Uncertainty in Ozone Profile and Total Column, *Journal of Geophysical Research: Atmospheres*, 123, 3243–3268, <https://doi.org/https://doi.org/10.1002/2017JD027791>, 2018.
- 495 Zhang, J., Tian, W., Wang, Z., Xie, F., and Wang, F.: The Influence of ENSO on Northern Midlatitude Ozone during the Winter to Spring Transition, *Journal of Climate*, 28, 4774 – 4793, <https://doi.org/10.1175/JCLI-D-14-00615.1>, 2015.
